# Supplementary material
Source: publisher site journal article supplement (https://www.dovepress.com/article/477986)
Supplement: Supplementary file 1 [file get_supplementary_file.php]

**Supplementary file with data not shown in manuscript**

Table S1: Attrition analysis of the included population and people excluded due to incomplete data on spirometry, myocardial infarctions or coronary artery disease

|  | **Included**  **N = 20,882** | **Excluded**  **N = 9272** | **p-value** |
| --- | --- | --- | --- |
| Male sex | 10197 (49%) | 4449 (48%) | 0.174 |
| Age | 58 (4.3) | 57 (4.3) | 0.768 |

Table S2: Multi-nominal regression models of the association of CAL with MI-CAD and MINOCA

|  | **MI-CAD** | | | | **MINOCA** | | |
| --- | --- | --- | --- | --- | --- | --- | --- |
| **Univariable model**  **OR (95%CI)** | **Multivariable main model***  **OR (95%CI)** | **Multivariable main model with additional adjustment****  **OR (95%CI)** | | **Univariable model**  **OR (95%CI)** | **Multivariable main model***  **OR (95%CI)** | **Multivariable main model with additional adjustment****  **OR (95%CI)** |
| **CAL** | 2.38 (1.74 to 3.26) | 1.72 (1.22 to 2.42) | 2.08 (1.46 to 2.96) | | 2.21 (1.16 to 4.23) | 1.99 (1.02 to 3.86) | 2.15 (1.10 to 4.17) |
| * adjusted for sex, age, ever smoking, body mass index, educational level, treatment for hypertension, treatment for diabetes mellitus and heredity for MI**. **** adjusted for sex, age, ever smoking, body mass index, educational level, treatment for hypertension, treatment for diabetes mellitus and heredity for MI andadditional adjustment for CRP and treatment of hyperlipidemia.  *Abbreviations: CAL = chronic airflow limitation, CI = confidence interval, MI-CAD = MI with obstructive coronary artery disease, MINOCA = myocardial infarction with nonobstructive coronary arteries, OR = odds ratio.* | | | | | | | |
|  | | | |  | | |  |
